# Supplementary material for: Digital Health Interventions in Physiotherapy: Development of Client and Health Care Provider Survey Instruments
Source: PubMed Central journal article supplement (PMC8367153; doi:10.2196/25177), 2021-07-28
Supplement: resprot_v10i7e25177_app1.pdf [file resprot_v10i7e25177_app1.pdf]

## Appendix 1. Pilot participant characteristics

| Pilot participant | Age range (years) | Sex | Primary condition<br>(treated or, received)<br><i>*Physios treating<br/>variety = multiple</i> |
|-------------------|-------------------|-----|------------------------------------------------------------------------------------------------|
| Physio1           | 30-39             | F   | Pelvis/hip                                                                                     |
| Physio2           | 50-59             | M   | Low back/buttock                                                                               |
| Physio3           | 60-69             | F   | Shoulder                                                                                       |
| Physio4           | 20-29             | M   | Multiple                                                                                       |
| Physio5           | 30-39             | F   | Multiple                                                                                       |
| Physio6           | 30-39             | M   | Multiple                                                                                       |
| Physio7           | 30-39             | M   | Multiple                                                                                       |
| Physio8           | 40-49             | M   | Ankle/foot                                                                                     |
| Physio9           | 40-49             | F   | Multiple                                                                                       |
| Patient1          | 30-39             | F   | Low back/buttock                                                                               |
| Patient2          | 60-69             | F   | Pelvis/hip                                                                                     |
| Patient3          | 60-69             | F   | Knee                                                                                           |
| Patient4          | 30-39             | M   | Low back/buttock                                                                               |
| Patient5          | 20-29             | F   | Ankle/foot                                                                                     |
| Patient6          | 70+               | M   | Multiple                                                                                       |
| Patient7          | 20-29             | M   | Knee                                                                                           |
| Patient8          | 60-69             | F   | Multiple                                                                                       |
| Patient9          | 30-39             | F   | Multiple                                                                                       |
| Patient10         | 70+               | F   | Ankle/foot                                                                                     |
| Patient11         | 40-49             | F   | Shoulder                                                                                       |
