# Supplementary material for: Digital Health Interventions in Physiotherapy: Development of Client and Health Care Provider Survey Instruments
Source: PubMed Central journal article supplement (PMC8367153; doi:10.2196/25177), 2021-07-28
Supplement: resprot_v10i7e25177_app2.pdf [file resprot_v10i7e25177_app2.pdf]

Appendix 2. Functions of DHI-Clients RECODED for COMPREHENSION

| ORIGINAL                                             |                                                                                  |  | RE-CODED                                   | V1                                                                        | V2                                                                          | V3                                                                                                                           | V4                                                                                                                    | V5                                                                             |
|------------------------------------------------------|----------------------------------------------------------------------------------|--|--------------------------------------------|---------------------------------------------------------------------------|-----------------------------------------------------------------------------|------------------------------------------------------------------------------------------------------------------------------|-----------------------------------------------------------------------------------------------------------------------|--------------------------------------------------------------------------------|
| <b>1.1 Targeted client communication</b>             | Transmit health event alerts to specific population groups                       |  | <b>1.1 Targeted communications</b>         | Send health alerts to specific populations                                | Sends health alerts to specific groups of people                            | Send urgent health alerts that people living with my condition need to know                                                  | Send me urgent health alerts that people living with my condition need to know (e.g. medication product recalls, etc) |                                                                                |
|                                                      | Transmit targeted health information to clients on health status or demographics |  |                                            | Send targeted health information to me                                    | Send targeted health information to me                                      | Send health information of interest to people living with condition                                                          | Send me health information of interest to people living with condition (e.g about new treatments, research, etc)      |                                                                                |
|                                                      | Transmit targeted alerts and reminders to clients                                |  |                                            | Send targeted alerts and reminders to me                                  | Send targeted health alerts and reminders to me                             | Send targeted alerts and reminders relevant specifically to me                                                               | Send personalised alerts and reminders relevant specifically to me (e.g about services I've booked or have coming up) |                                                                                |
| <b>1.2 Untargeted client communication</b>           | Transmit diagnostic results, or availability of results to clients               |  |                                            | Send diagnostic test results, or availability of results                  | Sends me health test results, or tells me results are available             |                                                                                                                              |                                                                                                                       |                                                                                |
|                                                      | Transmit untargeted health information to an undefined population                |  | <b>1.2 General communications</b>          | Send general health information                                           | Send me general health information                                          | Send me general news or information about good health                                                                        | Send me general news or information about good health or healthy living                                               |                                                                                |
| <b>1.3 Client to client communication</b>            | Transmit untargeted health event alerts to undefined group                       |  |                                            | Send general health alerts                                                | Send me general health alerts                                               | Send me general health alerts (e.g. about environmental factors impacting my ability to exercise- weather, air quality, etc) |                                                                                                                       |                                                                                |
|                                                      | Peer group for clients                                                           |  | <b>1.3 Person to person communications</b> | Online peer to peer communication and support groups                      | Exchange online peer communication with groups living with my condition     | Communicate online with other peer groups of people living with my condition                                                 |                                                                                                                       |                                                                                |
| <b>1.4 Personal health tracking</b>                  | Access by client to own medical records                                          |  | <b>1.4 Personal health tracking</b>        | Access to my own medical records                                          | Access my own medical records                                               |                                                                                                                              |                                                                                                                       |                                                                                |
|                                                      | Self-monitoring of health or diagnostic data by clients                          |  |                                            | Self-monitoring of my health or diagnosis-related information             | Self monitor my health or diagnosis-related information                     | Self monitor my condition or diagnosis-related information                                                                   |                                                                                                                       |                                                                                |
|                                                      | Active data capture /documentation by clients                                    |  |                                            | Ability to actively collect health metrics or information and document it | To actively collect information about my condition's status and document it | Actively collect information about my condition's status and document it                                                     | Actively collect information about my condition or injury status and document it                                      | Actively collect information about my condition or injury status and record it |
| <b>1.5 Citizen-based reporting</b>                   | Reporting of health system feedback by clients                                   |  | <b>1.5 Citizen-based reporting</b>         | Reporting feedback about the health system by people like me              | Collect and provide feedback about the health system by people like me      | Collect and provide feedback about the health system by people like me                                                       | Allow me to collect and provide feedback about the health system                                                      |                                                                                |
|                                                      | Reporting of public health events by clients                                     |  |                                            | Reporting of public health events by people like me                       | Report public health events by people like me                               | Report urgent public health events by that people living with my condition need to know                                      | Allow me to report urgent public health events/issues that people living with my condition need to know               |                                                                                |
| <b>1.6 On-demand information services to clients</b> | Client look-up of health information                                             |  | <b>1.6 Information when I need it</b>      | I can look up health information                                          | To look up health information                                               |                                                                                                                              |                                                                                                                       |                                                                                |
| <b>1.7 Client financial transactions</b>             | Transmit or manage out of pocket payments by clients                             |  | <b>1.7 Financial transactions</b>          | Send or manage out of pocket payments                                     | Send or manage any 'out of pocket' payments                                 | Send or manage any 'out of pocket' payments I may need to pay                                                                |                                                                                                                       |                                                                                |
|                                                      | Transmit or manage vouchers to clients for health services                       |  |                                            | Send or manage vouchers for health services                               | Send or manage vouchers for health services (e.g travel vouchers)           | Send or manage vouchers/coupons I might have for health services (e.g travel vouchers, etc)                                  |                                                                                                                       |                                                                                |
|                                                      | Transmit or manage incentives to clients for health services                     |  |                                            | Send or manage rewards or incentives for health services                  | Send or manage rewards or incentives for using health services              | Send or manage rewards or incentives I have to use health services                                                           |                                                                                                                       |                                                                                |
