# Supplementary material for: Digital Health Interventions in Physiotherapy: Development of Client and Health Care Provider Survey Instruments
Source: PubMed Central journal article supplement (PMC8367153; doi:10.2196/25177), 2021-07-28
Supplement: resprot_v10i7e25177_app3.pdf [file resprot_v10i7e25177_app3.pdf]

Appendix 3. Functions of DHI-Healthcare Providers RECODED for COMPREHENSION

|                                                             |                                                                               |                                                      | V1                                                                                                                                                                            | V2                                                                                              | V3                                                                                             | V4                                                                       | V5                                                      |
|-------------------------------------------------------------|-------------------------------------------------------------------------------|------------------------------------------------------|-------------------------------------------------------------------------------------------------------------------------------------------------------------------------------|-------------------------------------------------------------------------------------------------|------------------------------------------------------------------------------------------------|--------------------------------------------------------------------------|---------------------------------------------------------|
| ORIGINAL                                                    |                                                                               | RE-CODED                                             |                                                                                                                                                                               |                                                                                                 |                                                                                                |                                                                          |                                                         |
| <b>2.1 Client Identification &amp; Registration</b>         | Verify client unique identity                                                 | <b>2.1 Patient identification &amp; registration</b> | Verify a patient's details                                                                                                                                                    | Confirm a patient's details (e.g demographics)                                                  | Verify a patient's details on a new form                                                       | Verify a patient's personal details (e.g. new patient registration)      |                                                         |
|                                                             | Enrol client for a health service or care planning activity                   |                                                      | Register a patient for a service or care planning activity                                                                                                                    | Enrol a patient into a service or care planning activity                                        | Make a clinical appointment                                                                    |                                                                          |                                                         |
| <b>2.2 Client Health Records</b>                            | Longitudinal tracking of client's health status & services                    | <b>2.2 Patient Health Records</b>                    | Track a patient's health status &/or service use over time                                                                                                                    | Track a patient's condition &/or clinical service use over time                                 | Track a patient's condition and/or clinical service use over time                              |                                                                          |                                                         |
|                                                             | Manage the client's UNSTRUCTURED clinical records                             |                                                      | Manage a patient's unstructured clinical records (ie this means electronic notes that aren't organised in any organised/meaningful way)                                       | Manage a patient's free-text, clinical progress notes                                           | Enter a patient's free-text clinical progress notes                                            |                                                                          |                                                         |
|                                                             | Manage the client's STRUCTURED clinical record                                |                                                      | Manage a patient's structured clinical records (ie this means electronic notes that are organised and categorised according to standardised codes, checkboxes, and dropdowns) | Manage a patient's clinical progress using standardised coding, checkboxes, and dropdown menus  | Record or code a patient's condition using standardised coding, checkboxes, and dropdown menus |                                                                          |                                                         |
|                                                             | Routine health indicator data collection & management                         |                                                      | Collect & manage routine indicators of patient's health status                                                                                                                | Collect & manage clinical indicators of the status of a patient's condition                     | Record and flag indicators or changes in a patient's condition                                 | Record and/or flag indicators of change in a patient's condition         |                                                         |
| <b>2.3 Healthcare Provider Decision Support</b>             | Provide prompts and alerts according to a specific protocol                   | <b>2.3 Clinician decision-support</b>                | Provide prompts and alerts according to a specific protocol                                                                                                                   | Provide prompts and alerts that follow specific protocols (e.g. decision support flow diagrams) | Prompt and alert me using software that supports clinical decision making                      | Prompt my thinking using software that supports clinical decision-making |                                                         |
|                                                             | Provide a checklist according to a specific protocol                          |                                                      | Provide a checklist according to a specific protocol                                                                                                                          | Provide a checklist that follow's a specific protocol                                           | Provide a digital checklist of clinical procedures                                             | Provide me a digital checklist of clinical procedures to follow          |                                                         |
|                                                             | Screen clients by risk or, other health status                                |                                                      | Screen patients by risk or, other health status indicators                                                                                                                    | Screen patients                                                                                 | Screen my patients                                                                             |                                                                          |                                                         |
| <b>2.4 Telemedicine</b>                                     | Consultations between remote client and healthcare provider                   | <b>2.4 Telemedicine</b>                              | Consultations between a remotely located patient and clinician                                                                                                                | Conduct consultations with remotely located patients                                            | Conduct remote consultations                                                                   |                                                                          |                                                         |
|                                                             | Remote monitoring of client health, or diagnostic data by healthcare provider |                                                      | Remote monitoring of patient's health status, or diagnostic data by clinician                                                                                                 | Remotely monitor a patient's condition, or track diagnostic data                                | Remotely monitor or track a patient's condition                                                |                                                                          |                                                         |
|                                                             | Transmission of health-related data to healthcare provider                    |                                                      | Transmission of health-related data to clinician                                                                                                                              | Transmit health-related data about my patient back to me                                        | Send me data about my patient's condition                                                      |                                                                          |                                                         |
|                                                             | Consultations for case-management between healthcare providers                |                                                      | Consultations for case-management between clinicians                                                                                                                          | Conduct consultations/meetings with other clinicians for case-management                        | Conduct case consultations with other clinicians                                               |                                                                          |                                                         |
| <b>2.5 Healthcare Provider Communication</b>                | Communication from healthcare providers to supervisor                         | <b>2.5 Clinician communications</b>                  | Communication from clinicians to their manager or supervisor                                                                                                                  | To communicate with a manager or supervisor                                                     | Communicate with a manager or supervisor                                                       |                                                                          |                                                         |
|                                                             | Communication and performance feedback to healthcare providers                |                                                      | Communication and performance feedback to clinicians                                                                                                                          | To communicate or provide feedback to me about my clinical performance                          | Provide me with feedback about my clinical performance                                         |                                                                          |                                                         |
|                                                             | Transmit routine news and workflow notifications to healthcare providers      |                                                      | Transmit routine updates and workflow notifications to clinicians                                                                                                             | Transmit routine updates and workflow notifications to me                                       | Send me routine updates and workflow notifications                                             |                                                                          |                                                         |
|                                                             | Transmit non-routine health event alerts to healthcare providers              |                                                      | Transmit non-routine health event alerts about a patient to clinician                                                                                                         | Transmit non-routine alerts about a patient's condition status to me                            | Send non-routine or unexpected health event alerts about a patient                             |                                                                          |                                                         |
|                                                             | Peer-group for healthcare providers                                           |                                                      | Online peer-to-peer group for clinicians                                                                                                                                      | Online peer-to-peer communication group for clinicians                                          | Online peer communication groups                                                               | Create online peer communication groups for clinicians                   | Utilise online peer communication groups for clinicians |
| <b>2.6 Referral Coordination</b>                            | Coordinate emergency response and transport                                   | <b>2.6 Referral Coordination</b>                     | Coordinate emergency responses and patient transport                                                                                                                          | Coordinate emergency responses and transport for a patient                                      | Coordinate emergency responses and transport for a patient                                     | Coordinate emergency responses and/or transport for a patient            |                                                         |
|                                                             | Manage referrals between points of service with health sector                 |                                                      | Manage referrals between different points of service in the health system                                                                                                     | Manage referrals between different points of services in the health system                      | Manage health services referrals e.g. to other clinicians                                      | Manage health services referrals or reports (e.g. to other clinicians)   |                                                         |
|                                                             | Manage referrals between health and other sectors                             |                                                      | Manage referrals between the health system and other sectors                                                                                                                  | Manage referrals between the health system and other sectors                                    | Manage referrals to external bodies e.g. government services                                   | Manage referrals or reports to external bodies e.g. government services  |                                                         |
| <b>2.7 Health Worker Activity Planning &amp; Scheduling</b> | Identify clients in need of services                                          | <b>2.7 Clinician workflow coordination</b>           | Identify patients in need of services                                                                                                                                         | Identify patients in need of a health service                                                   | Identify patients in need of a health service                                                  |                                                                          |                                                         |
|                                                             | Schedule healthcare provider's activities                                     |                                                      | Schedule clinician's activities                                                                                                                                               | Schedule my clinical activities                                                                 | Schedule my clinical activities                                                                |                                                                          |                                                         |
| <b>2.8 Healthcare Provider Training</b>                     | Provide training content to healthcare providers                              | <b>2.8 Clinician training</b>                        | Provide training or educational content to clinicians                                                                                                                         | Provide training or educational content to me                                                   | Provide training or educational content to me                                                  | Provide me with training or educational content                          |                                                         |
|                                                             | Assess capacity of healthcare providers                                       |                                                      | Assess capacity, or performance of clinicians                                                                                                                                 | To assess my clinical capacity, or performance                                                  | Assess my clinical capacity                                                                    | Assess my clinical capacity, or performance                              |                                                         |
| <b>2.9 Prescription &amp; Medication Management</b>         | Transmit or track prescription orders                                         | <b>2.9 Prescription &amp; medication management</b>  | Transmit or track prescription orders                                                                                                                                         | Transmit or track prescriptions                                                                 | Track prescription orders                                                                      |                                                                          |                                                         |
|                                                             | Track clients' medication consumption                                         |                                                      | Track patient's medication consumption                                                                                                                                        |                                                                                                 |                                                                                                |                                                                          |                                                         |
| <b>2.10 Laboratory &amp; Diagnostic Imaging Management</b>  | Report adverse drug events                                                    | <b>2.10 Pathology &amp; Imaging Management</b>       | Report drug adverse events                                                                                                                                                    | Report adverse medication events                                                                |                                                                                                |                                                                          |                                                         |
|                                                             | Transmit diagnostic result to healthcare providers                            |                                                      | Transmit diagnostic results to clinicians                                                                                                                                     | Transmit diagnostic results                                                                     | Send diagnostic imaging results to me e.g. scans                                               | Send me diagnostic imaging results (e.g. scans)                          |                                                         |
|                                                             | Transmit and track diagnostic orders                                          |                                                      | Transmit and track diagnostic orders                                                                                                                                          | Transmit and track diagnostic orders (i.e. scans)                                               | Track diagnostic imaging orders                                                                |                                                                          |                                                         |
|                                                             | Capture diagnostic results from digital devices                               |                                                      | Capture diagnostic results from digital devices                                                                                                                               |                                                                                                 |                                                                                                |                                                                          |                                                         |
|                                                             | Track biological specimens                                                    |                                                      | Track pathology specimens                                                                                                                                                     | Track pathology e.g. blood tests                                                                |                                                                                                |                                                                          |                                                         |
