# Supplementary material for: Digital Health Interventions in Physiotherapy: Development of Client and Health Care Provider Survey Instruments
Source: PubMed Central journal article supplement (PMC8367153; doi:10.2196/25177), 2021-07-28
Supplement: resprot_v10i7e25177_app5.pdf [file resprot_v10i7e25177_app5.pdf]

# Digital Health Intervention Willingness – Healthcare Provider Survey – DHIW-HCP

---

## Using Digital Health Technology in [insert healthcare discipline] Practice

Thank you for your interest in our study.

This study aims to explore the potential for **digital health technologies** (e.g. smartphones, apps, electronic health records, wearable sensors, digital video...to name a few) to support the delivery of [insert healthcare discipline] care to patients with [insert condition(s)].

We are interested in your opinions of how these technologies can support the assessment and management of patients.

---

## **Willingness to Use Digital Health Technologies**

Digital technologies (e.g. smartphones, apps, electronic health records, wearable sensors, digital video, etc) can be used to support a range of different **FUNCTIONS** in health care. These are listed below\*.

We are interested in understanding **HOW WILLING YOU ARE** to use digital health technology to support you in your clinical role as a [insert healthcare discipline].

*\*The following items are adaptations of items in the World Health Organisation's Classifications of Digital Health Interventions v1.0*

---

For each FUNCTION listed below, **HOW WILLING ARE YOU** to use digital technology to...

|                                                                                                | Not at all willing    | A little bit          | Somewhat              | Quite a bit           | Very much willing     |
|------------------------------------------------------------------------------------------------|-----------------------|-----------------------|-----------------------|-----------------------|-----------------------|
| Verify a patient's personal details (e.g. new patient registration)                            | <input type="radio"/> | <input type="radio"/> | <input type="radio"/> | <input type="radio"/> | <input type="radio"/> |
| Make a clinical appointment                                                                    | <input type="radio"/> | <input type="radio"/> | <input type="radio"/> | <input type="radio"/> | <input type="radio"/> |
| Track a patient's condition and/or clinical service use over time                              | <input type="radio"/> | <input type="radio"/> | <input type="radio"/> | <input type="radio"/> | <input type="radio"/> |
| Enter a patient's free-text clinical progress notes                                            | <input type="radio"/> | <input type="radio"/> | <input type="radio"/> | <input type="radio"/> | <input type="radio"/> |
| Record or code a patient's condition using standardised coding, checkboxes, and dropdown menus | <input type="radio"/> | <input type="radio"/> | <input type="radio"/> | <input type="radio"/> | <input type="radio"/> |
| Record and/or flag indicators of change in a patient's condition                               | <input type="radio"/> | <input type="radio"/> | <input type="radio"/> | <input type="radio"/> | <input type="radio"/> |
| Prompt my thinking using software that supports clinical decision-making                       | <input type="radio"/> | <input type="radio"/> | <input type="radio"/> | <input type="radio"/> | <input type="radio"/> |
| Provide me a digital checklist of clinical procedures to follow                                | <input type="radio"/> | <input type="radio"/> | <input type="radio"/> | <input type="radio"/> | <input type="radio"/> |
| Screen my patients                                                                             | <input type="radio"/> | <input type="radio"/> | <input type="radio"/> | <input type="radio"/> | <input type="radio"/> |
| Conduct remote consultations                                                                   | <input type="radio"/> | <input type="radio"/> | <input type="radio"/> | <input type="radio"/> | <input type="radio"/> |
| Remotely monitor or track a patient's condition                                                | <input type="radio"/> | <input type="radio"/> | <input type="radio"/> | <input type="radio"/> | <input type="radio"/> |
| Send me data about my patient's condition                                                      | <input type="radio"/> | <input type="radio"/> | <input type="radio"/> | <input type="radio"/> | <input type="radio"/> |
| Conduct case consultations with other clinicians                                               | <input type="radio"/> | <input type="radio"/> | <input type="radio"/> | <input type="radio"/> | <input type="radio"/> |
| Communicate with a manager or supervisor                                                       | <input type="radio"/> | <input type="radio"/> | <input type="radio"/> | <input type="radio"/> | <input type="radio"/> |
| Provide me with feedback about my clinical performance                                         | <input type="radio"/> | <input type="radio"/> | <input type="radio"/> | <input type="radio"/> | <input type="radio"/> |
|                                                                                                | Not at all willing    | A little bit          | Somewhat              | Quite a bit           | Very much willing     |

|                                                                           |                       |                       |                       |                       |                       |
|---------------------------------------------------------------------------|-----------------------|-----------------------|-----------------------|-----------------------|-----------------------|
| Send me routine updates and workflow notifications                        | <input type="radio"/> | <input type="radio"/> | <input type="radio"/> | <input type="radio"/> | <input type="radio"/> |
| Send me non-routine or unexpected health event alerts about a patient     | <input type="radio"/> | <input type="radio"/> | <input type="radio"/> | <input type="radio"/> | <input type="radio"/> |
| Utilise online peer communication groups for clinicians                   | <input type="radio"/> | <input type="radio"/> | <input type="radio"/> | <input type="radio"/> | <input type="radio"/> |
| Coordinate emergency responses and/or transport for a patient             | <input type="radio"/> | <input type="radio"/> | <input type="radio"/> | <input type="radio"/> | <input type="radio"/> |
| Manage health service referrals or reports (e.g. to other clinicians)     | <input type="radio"/> | <input type="radio"/> | <input type="radio"/> | <input type="radio"/> | <input type="radio"/> |
| Manage referrals or reports to external bodies (e.g. government services) | <input type="radio"/> | <input type="radio"/> | <input type="radio"/> | <input type="radio"/> | <input type="radio"/> |
| Identify patients in need of a health service                             | <input type="radio"/> | <input type="radio"/> | <input type="radio"/> | <input type="radio"/> | <input type="radio"/> |
| Schedule my clinical activities                                           | <input type="radio"/> | <input type="radio"/> | <input type="radio"/> | <input type="radio"/> | <input type="radio"/> |
| Provide me with training or educational content                           | <input type="radio"/> | <input type="radio"/> | <input type="radio"/> | <input type="radio"/> | <input type="radio"/> |
| Assess my clinical capacity, or performance                               | <input type="radio"/> | <input type="radio"/> | <input type="radio"/> | <input type="radio"/> | <input type="radio"/> |
| Track prescription orders                                                 | <input type="radio"/> | <input type="radio"/> | <input type="radio"/> | <input type="radio"/> | <input type="radio"/> |
| Track patients' medication consumption                                    | <input type="radio"/> | <input type="radio"/> | <input type="radio"/> | <input type="radio"/> | <input type="radio"/> |
| Report adverse medication events                                          | <input type="radio"/> | <input type="radio"/> | <input type="radio"/> | <input type="radio"/> | <input type="radio"/> |
| Send me diagnostic imaging results (e.g. scans)                           | <input type="radio"/> | <input type="radio"/> | <input type="radio"/> | <input type="radio"/> | <input type="radio"/> |
| Track diagnostic imaging orders                                           | <input type="radio"/> | <input type="radio"/> | <input type="radio"/> | <input type="radio"/> | <input type="radio"/> |
| Capture diagnostic results from digital devices                           | <input type="radio"/> | <input type="radio"/> | <input type="radio"/> | <input type="radio"/> | <input type="radio"/> |
| Track pathology (e.g. blood tests)                                        | <input type="radio"/> | <input type="radio"/> | <input type="radio"/> | <input type="radio"/> | <input type="radio"/> |

---

Can you think of any other **functions** not identified in the previous table that you think digital health technologies could assist with?

*(Please specify below)*

---

---

---

---

---
